# Supplementary material for: Replication of Real-World Evidence in Oncology Using Electronic Health Record Data Extracted by Machine Learning
Source: Cancers (Basel). 2023 Mar 20;15(6):1853. doi: 10.3390/cancers15061853 (PMC10046618; doi:10.3390/cancers15061853)
Supplement: Supplementary file 1 [file cancers-15-01853-s001.zip › cancers-2213590-supplementary.pdf]

## SUPPLEMENTARY MATERIAL

### *Modeling procedures for natural history of disease in biomarker sub-groups analysis*

We summarized the comparison of rWOS between *ROS1* positive and *ROS1* negative patients by estimating the hazard ratio (HR) and 95% CI with both a unadjusted and matched and adjusted Cox proportional hazards models. Further, we describe a robustness check to evaluate an alternative approach to select covariates for statistical adjustment. Each Cox proportional hazards model was fit using risk set adjustment.

#### Unadjusted Cox proportional hazards model

We fit a risk set adjusted univariable Cox proportional hazards model.

#### Matched and adjusted Cox proportional hazards model

We matched patients with *ROS1* positive NSCLC to patients with *ROS1* negative NSCLC on: age at advanced diagnosis, year of advanced diagnosis, and gender. We fit a risk set adjusted multivariable Cox proportional hazards model to the matched cohort and statistically adjusted for treatment received, PD-L1 expression, ECOG PS, group stage at NSCLC diagnosis, cancer histology, practice type, and all matching variables (i.e., age at advanced diagnosis, year of advanced diagnosis, and gender) [39]. These variables were selected prior to analysis.

We matched patients using exact matching [40]. Once matched, we assigned IPW to patients in each stratum to calculate the ATE parameter and to achieve a 1:1 ratio of patients with *ROS1* positive and *ROS1* negative NSCLC.

#### Robustness Check

An alternative approach to covariate selection is to include covariates based on their known or perceived association with the independent (i.e., *ROS1* result) or dependent variable of interest (i.e., survival) [41]. In this robustness check, we statistically controlled for variables that were significantly associated with either *ROS1* result or survival in the Abstracted and ML-extracted cohort, respectively. Evaluated covariates included treatment received, PD-L1 expression, ECOG PS, group stage at NSCLC diagnosis, cancer histology, practice type, and race/ethnicity. For both the Abstracted and ML-extract cohort, all evaluated variables were significantly ( $p < 0.05$ ) associated with either *ROS1* result or survival and included in the Cox proportional hazards model as well as all matching variables.

**Table S1.** Biomarker-defined cohort attrition table.

| Inclusion-Exclusion Criterion                                    | Expert<br>Abstraction | ML<br>Extraction |
|------------------------------------------------------------------|-----------------------|------------------|
| <i>Patients with a lung cancer ICD code</i>                      | 186,313               | 186,313          |
| <i>Diagnosed with NSCLC on or after January 1, 2011</i>          | 113,648               | 125,774          |
| <i>Diagnosed with advanced NSCLC on or after January 1, 2011</i> | 77,702                | 79,859           |

|                                                                                                                      |        |        |
|----------------------------------------------------------------------------------------------------------------------|--------|--------|
| <i>At least 2 clinic visits in the real-world database occurring on different days after advanced diagnosis date</i> | 74,924 | 77,074 |
| <i>Had a ROS1 test result after initial NSCLC diagnosis</i>                                                          | 36,472 | 38,009 |
| <i>ROS1 Positive or ROS1 Negative and never for ALK, BRAF, EGFR Positive</i>                                         | 27,827 | 29,586 |
| <i>ROS1 Status</i>                                                                                                   |        |        |
| ● <i>Only ROS1 Negative and never ALK, BRAF, EGFR Positive</i>                                                       | 27,478 | 29,219 |
| ● <i>Ever ROS1 Positive</i>                                                                                          | 349    | 367    |

Abbreviations: ALK: Anaplastic Lymphoma Kinase; EGFR: Epidermal Growth Factor Receptor; NSCLC: non-small cell lung cancer

**Table S2.** Robustness check of the association between *ROS1* status and survival, by data curation approach

| <b>RWD Curation Approach</b> | <b>Treatment Effectiveness HR (95% CI)</b> | <b>SE</b> | <b>P-value</b> |
|------------------------------|--------------------------------------------|-----------|----------------|
| Expert Abstracted Data       | 0.91 (0.74, 1.13)                          | 0.107     | 0.389          |
| ML-Extracted Data            | 0.97 (0.76, 1.24)                          | 0.126     | 0.786          |

Abbreviations: CI: confidence interval; HR: hazard ratio; ML: machine learning; SE: standard error

**Table S3.** Treatment-defined cohort attrition table

| <b>Inclusion-Exclusion Criterion</b>                                                                                 | <b>Expert Abstraction</b> | <b>ML Extraction</b> |
|----------------------------------------------------------------------------------------------------------------------|---------------------------|----------------------|
| <i>Patients with a lung cancer ICD code</i>                                                                          | 186,313                   | 186,313              |
| <i>Diagnosed with NSCLC on or after January 1, 2011</i>                                                              | 113,648                   | 125,774              |
| <i>Diagnosed with advanced NSCLC on or after January 1, 2011</i>                                                     | 77,702                    | 79,859               |
| <i>At least 2 clinic visits in the real-world database occurring on different days after advanced diagnosis date</i> | 74,919                    | 77,070               |
| <i>Non-squamous histology consistent with NSCLC</i>                                                                  | 52,270                    | 53,961               |

|                                                                                                             |       |       |
|-------------------------------------------------------------------------------------------------------------|-------|-------|
| <i>Received one of the two study LOTs of interest</i>                                                       | 5,576 | 5,576 |
| <i>Age 18 or older at LOT start</i>                                                                         | 5,576 | 5,576 |
| <i>Adequate organ function around 1L start</i>                                                              | 3,330 | 3,379 |
| <i>ECOG PS 0-1 around 1L start</i>                                                                          | 1,884 | 1,858 |
| <i>Does not have elevated blood pressure<sup>1</sup> around 1L start</i>                                    | 1,634 | 1,601 |
| <i>Does not have metastasis of the central nervous system (CNS)<sup>2</sup> at any time before 1L start</i> | 1,633 | 1,598 |
| <i>Group stage IV at initial diagnosis</i>                                                                  | 682   | 701   |
| <i>1L LOT received</i>                                                                                      |       |       |
| ● Bevacizumab-Carboplatin-Paclitaxel                                                                        | 236   | 242   |
| ● Carboplatin-Paclitaxel                                                                                    | 446   | 459   |

Abbreviations: 1L: first line; ECOG PS: Eastern Cooperative Oncology Group Performance Status; LOT: line of therapy; NSCLC: non-small cell lung cancer

<sup>1</sup> Elevated blood pressure was defined as a diastolic blood pressure above 100 systolic blood pressure above 150.

<sup>2</sup> Metastasis of the CNS defined using ICD codes (ICD-9: 198.4 and ICD-10: C79.4)
